# Supplementary material for: Stick–slip water penetration into capillaries coated with swelling hydrogel
Source: Royal Society of Chemistry journal article supplement (doi:10.1039/c5sm00660k), 2015-01-01
Supplement: c5sm00660k1.pdf [file c5sm00660k1.pdf]

## Stick-Slip Water Penetration into Capillaries Coated with Swelling Hydrogel: Supplementary Info

Video 1: water propagation through a 700  $\mu\text{m}$  ID capillary with PNIPAM coating on the inner wall

Video 2: Swelling of PNIPAM coating when water reaches the end of a capillary

Video 3: 200X zoom of meniscus propagation through PNIPAM coated capillary. (TOP) water (BOTTOM) glycerol

Video 4: Contact angle evolution on PNIPAM film. (TOP) water (BOTTOM) glycerol
